# Supplementary material for: Effect of Debittering with Different Solvents and Ultrasound on Carotenoids, Tocopherols, and Phenolics of Lupinus albus Seeds
Source: MDPI journal article supplement (doi:10.3390/antiox11122481), 2022-12-16
Supplement: s1 [file s1]

**Supplementary Table S1.** Analysis of variance (mean square) and LSD test of tocopherols and carotenoids content (mg/kg DM; mean  $\pm$  standard error) of *Lupinus albus* seeds (Lot 1) after debittering without and with ultrasound (US), and with different solvents.

|                               | ANOVA         |             |          |         | LSD Treatment                 |                               | LSD Solvent                   |                               |
|-------------------------------|---------------|-------------|----------|---------|-------------------------------|-------------------------------|-------------------------------|-------------------------------|
|                               | Treatment (T) | Solvent (S) | T x S    | Error   | Without US                    | With US                       | 1% NaCl                       | 1% Citric acid                |
| d.f.                          | 1             | 1           | 1        | 4       |                               |                               |                               |                               |
| ( $\alpha + \beta$ )-carotene | 0.13 **       | 0.054 *     | 0.097 ** | 0.0040  | 2.46 <sup>a</sup> $\pm$ 0.04  | 2.21 <sup>b</sup> $\pm$ 0.11  | 2.42 <sup>a</sup> $\pm$ 0.03  | 2.26 <sup>b</sup> $\pm$ 0.14  |
| $\beta$ -cryptoxanthin        | 0.0028 *      | 0.26 ***    | 0.0036 * | 0.00021 | 0.26 <sup>b</sup> $\pm$ 0.09  | 0.30 <sup>a</sup> $\pm$ 0.12  | 0.11 <sup>b</sup> $\pm$ 0.00  | 0.46 <sup>a</sup> $\pm$ 0.02  |
| Lutein                        | 1.30 *        | 2.4 **      | 0.34     | 0.073   | 8.39 <sup>a</sup> $\pm$ 0.25  | 7.59 <sup>b</sup> $\pm$ 0.44  | 8.54 <sup>a</sup> $\pm$ 0.18  | 7.44 <sup>b</sup> $\pm$ 0.36  |
| Zeaxanthin                    | 0.030 *       | 0.21 **     | 0.025 *  | 0.0032  | 1.84 <sup>a</sup> $\pm$ 0.07  | 1.72 <sup>b</sup> $\pm$ 0.13  | 1.95 <sup>a</sup> $\pm$ 0.03  | 1.62 <sup>b</sup> $\pm$ 0.07  |
| Total carotenoids             | 2.6 *         | 3.1 *       | 0.99     | 0.15    | 12.97 <sup>a</sup> $\pm$ 0.27 | 11.83 <sup>b</sup> $\pm$ 0.56 | 13.02 <sup>a</sup> $\pm$ 0.23 | 11.77 <sup>b</sup> $\pm$ 0.55 |
| $\alpha$ -tocopherol          | 0.00080       | 0.0025      | 0.011*   | 0.00083 | 0.48 $\pm$ 0.02               | 0.50 $\pm$ 0.03               | 0.51 $\pm$ 0.03               | 0.47 $\pm$ 0.02               |
| $\beta$ -tocopherol           | 0.25 *        | 4.2 **      | 0.080    | 0.023   | 1.83 <sup>a</sup> $\pm$ 0.47  | 1.47 <sup>b</sup> $\pm$ 0.37  | 0.93 <sup>b</sup> $\pm$ 0.10  | 2.36 <sup>a</sup> $\pm$ 0.17  |
| $\gamma$ -tocopherol          | 359           | 79          | 0.50     | 78      | 185.83 $\pm$ 5.29             | 172.43 $\pm$ 2.19             | 182.28 $\pm$ 6.18             | 175.99 $\pm$ 4.23             |
| $\delta$ -tocopherol          | 0.10          | 0.15        | 0.011    | 0.069   | 1.67 $\pm$ 0.16               | 1.42 $\pm$ 0.11               | 1.69 $\pm$ 0.06               | 1.40 $\pm$ 0.18               |
| Total tocopherols             | 389           | 53          | 1.4      | 78      | 189.80 $\pm$ 5.16             | 175.82 $\pm$ 1.99             | 185.40 $\pm$ 6.19             | 180.22 $\pm$ 4.51             |

d.f.: degrees of freedom; \*,  $p \leq 0.05$ ; \*\*,  $p \leq 0.01$ ; \*\*\*,  $p \leq 0.001$ . Different letters indicate significant differences between samples according to the LSD test ( $p \leq 0.05$ ).

**Supplementary Table S2.** Analysis of variance (mean square) and LSD test of the polyphenols content (mg/kg DM; mean  $\pm$  standard error) of *Lupinus albus* seeds (Lot 1) after debittering without and with ultrasound (US), and with solvents different.

|                             | ANOVA         |             |         |       | LSD Treatment                   |                                 | LSD solvent                     |                                 |
|-----------------------------|---------------|-------------|---------|-------|---------------------------------|---------------------------------|---------------------------------|---------------------------------|
|                             | Treatment (T) | Solvent (S) | T x S   | Error | Without US                      | With US                         | 1% NaCl                         | 1% Citric acid                  |
| d.f.                        | 1             | 1           | 1       | 4     |                                 |                                 |                                 |                                 |
| <i>Free phenolics</i>       |               |             |         |       |                                 |                                 |                                 |                                 |
| Genistein der.              | 4.2           | 5068 ***    | 351 *** | 1.3   | 84.67 $\pm$ 10.71               | 86.12 $\pm$ 18.37               | 60.22 <sup>b</sup> $\pm$ 3.42   | 110.56 <sup>a</sup> $\pm$ 4.28  |
| Sinapic acid der.           | 711 *         | 989 *       | 0.86    | 50    | 96.70 <sup>a</sup> $\pm$ 6.57   | 77.85 <sup>b</sup> $\pm$ 7.49   | 98.39 <sup>a</sup> $\pm$ 5.27   | 76.15 <sup>b</sup> $\pm$ 6.94   |
| Naringenin der.             |               |             |         |       | 4.11 <sup>a</sup> $\pm$ 0.07    | 3.58 <sup>b</sup> $\pm$ 0.00    | nd                              | 3.85 $\pm$ 0.16                 |
| Diosmin der.                |               |             |         |       | 3.94 <sup>a</sup> $\pm$ 0.03    | 3.24 <sup>b</sup> $\pm$ 0.00    | nd                              | 3.59 $\pm$ 0.20                 |
| Apigenin der.               | 753 ***       | 5511 ***    | 183 **  | 4.3   | 132.93 <sup>a</sup> $\pm$ 17.95 | 113.53 <sup>b</sup> $\pm$ 12.40 | 96.99 <sup>b</sup> $\pm$ 2.91   | 149.47 <sup>a</sup> $\pm$ 8.43  |
| Total free                  | 2798 ***      | 15495 ***   | 12      | 36    | 318.32 <sup>a</sup> $\pm$ 24.75 | 280.91 <sup>b</sup> $\pm$ 26.30 | 255.60 <sup>b</sup> $\pm$ 11.51 | 343.62 <sup>a</sup> $\pm$ 10.66 |
| <i>Conjugated phenolics</i> |               |             |         |       |                                 |                                 |                                 |                                 |
| Genistein der.              | 2.8           | 461         | 380     | 79    | 97.28 $\pm$ 9.03                | 98.46 $\pm$ 3.84                | 90.28 $\pm$ 6.53                | 105.46 $\pm$ 3.93               |
| Genistein                   |               |             |         |       | 1.55 <sup>a</sup> $\pm$ 0.03    | 0.44 <sup>b</sup> $\pm$ 0.03    | nd                              | 1.00 $\pm$ 0.32                 |
| Naringenin der.             | 0.46          | 0.11        | 0.24    | 0.19  | 2.02 $\pm$ 0.22                 | 1.54 $\pm$ 0.21                 | 1.90 $\pm$ 0.25                 | 1.67 $\pm$ 0.25                 |
| Catechin der.               |               |             |         |       | 3.54 <sup>a</sup> $\pm$ 0.05    | 2.53 <sup>b</sup> $\pm$ 0.03    | nd                              | 3.04 $\pm$ 0.30                 |
| Apigenin der.               |               |             |         |       | 0.52 $\pm$ 0.05                 | 0.54 $\pm$ 0.01                 | 0.53 $\pm$ 0.03                 | nd                              |
| Total conjugated            | 0.26          | 681*        | 463     | 81    | 102.11 $\pm$ 10.38              | 101.75 $\pm$ 3.81               | 92.71 <sup>b</sup> $\pm$ 6.56   | 111.16 <sup>a</sup> $\pm$ 4.75  |
| <i>Bound phenolics</i>      |               |             |         |       |                                 |                                 |                                 |                                 |
| Genistein der.              | 9.4           | 891 **      | 23      | 16    | 41.47 $\pm$ 7.28                | 43.63 $\pm$ 5.32                | 53.10 <sup>a</sup> $\pm$ 1.64   | 31.99 <sup>b</sup> $\pm$ 2.27   |
| Naringenin der.             | 0.000013      | 28          | 0.79    | 4.2   | 16.82 $\pm$ 1.42                | 16.82 $\pm$ 1.34                | 18.71 $\pm$ 1.05                | 14.94 $\pm$ 0.60                |
| Catechin der.               | 2.2           | 708 ***     | 0.96    | 1.8   | 18.49 $\pm$ 5.65                | 17.44 $\pm$ 5.27                | 27.37 <sup>a</sup> $\pm$ 0.83   | 8.56 <sup>b</sup> $\pm$ 0.41    |
| Apigenin der.               | 0.00080       | 52 ***      | 0.011   | 0.19  | 3.43 $\pm$ 1.51                 | 3.41 $\pm$ 1.45                 | 0.87 <sup>b</sup> $\pm$ 0.07    | 5.96 <sup>a</sup> $\pm$ 0.24    |
| Total bound                 | 2.4           | 2980 **     | 23      | 47    | 80.21 $\pm$ 12.56               | 81.30 $\pm$ 10.41               | 100.05 <sup>a</sup> $\pm$ 3.18  | 61.45 <sup>b</sup> $\pm$ 2.79   |
| <i>Total phenolics</i>      | 2690*         | 9212 **     | 179     | 163   | 500.64 <sup>a</sup> $\pm$ 22.45 | 463.96 <sup>b</sup> $\pm$ 18.25 | 448.37 <sup>b</sup> $\pm$ 9.46  | 516.23 <sup>a</sup> $\pm$ 14.28 |

d.f.: degrees of freedom; der.: derivative; nd: below the detection limit. \*,  $p \leq 0.05$ ; \*\*,  $p \leq 0.01$ ; \*\*\*,  $p \leq 0.001$ . Different letters indicate significant differences between samples according to the LSD test ( $p \leq 0.05$ ).
